# Supplementary material for: Quantifying differences in iron deficiency-attributable anemia during pregnancy and postpartum
Source: PubMed Central journal article supplement — Cell Rep Med. 2023 Jul 5;4(7):101097. doi: 10.1016/j.xcrm.2023.101097 (PMC10394161; doi:10.1016/j.xcrm.2023.101097), 2023-07-05
Supplement: mmc1.pdf [file mmc1.pdf]

**Cell Reports Medicine, Volume 4**

**Supplemental information**

**Quantifying differences  
in iron deficiency-attributable anemia  
during pregnancy and postpartum**

**Eliza M. Davidson, Michelle J.L. Scoullar, Elizabeth Peach, Christopher J. Morgan, Pele Melepia, D. Herbert Opi, Hadlee Supsup, Priscah Hezeri, Wilson Philip, Dukduk Kabi, Kerryanne Tokmun, Rose Suruka, Ruth Fidelis, Arthur Elijah, Peter M. Siba, William Pomat, Benishar Kombut, Leanne J. Robinson, Brendan S. Crabb, Elissa Kennedy, Philippe Boeuf, Julie A. Simpson, James G. Beeson, and Freya J.I. Fowkes**

## Additional File 1

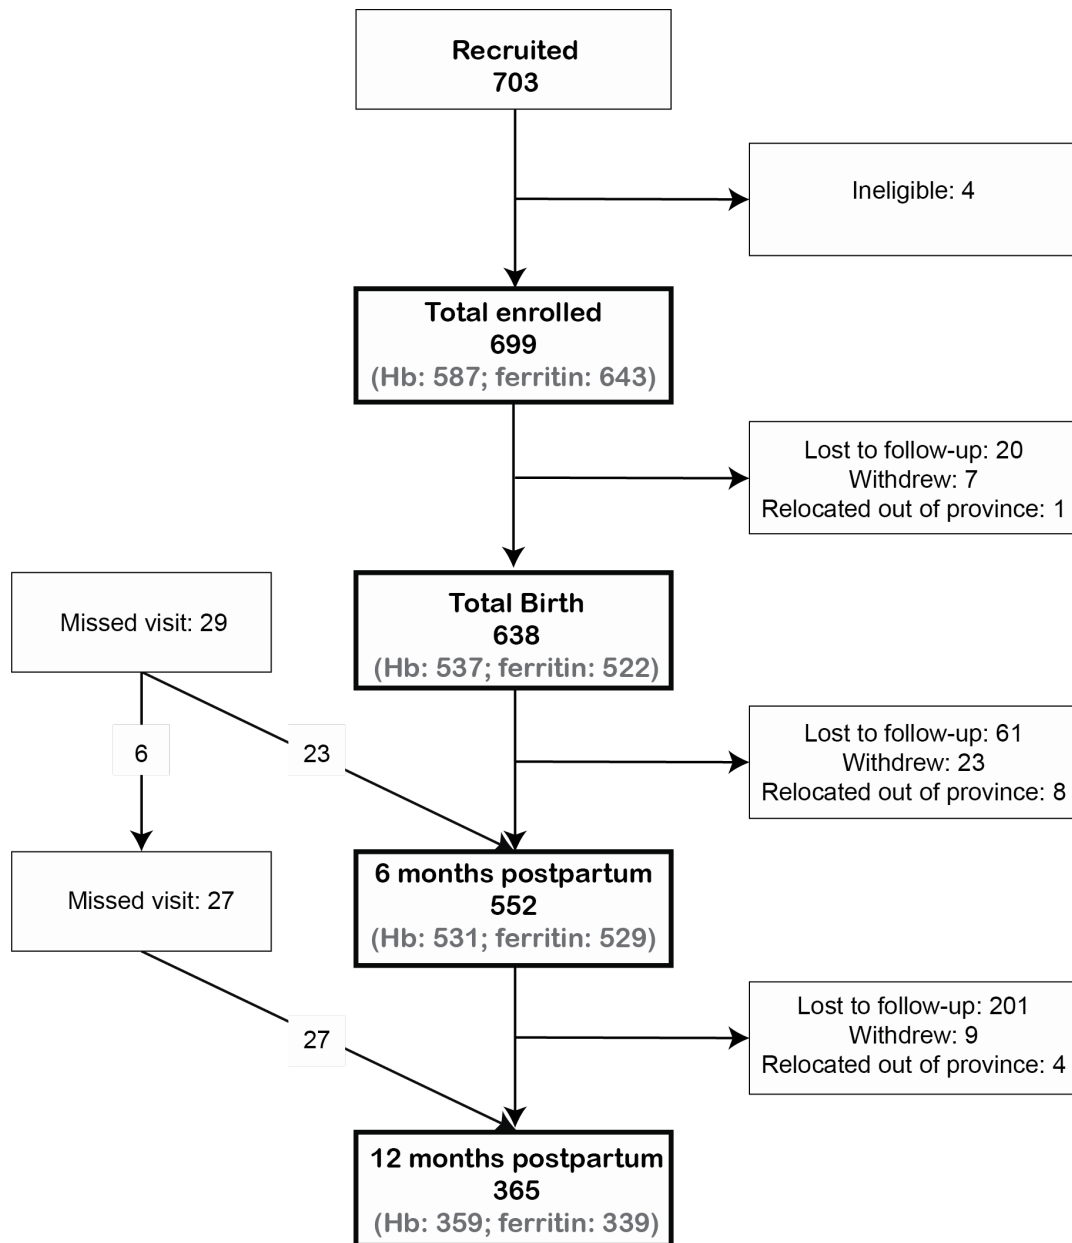

**Supplementary Figure 1: Flow diagram of women enrolled and the subset followed to birth, 6 months postpartum and 12 months postpartum; and the haemoglobin (Hb) and ferritin measurements available at each visit. Related to Subject Details in STAR Methods.**

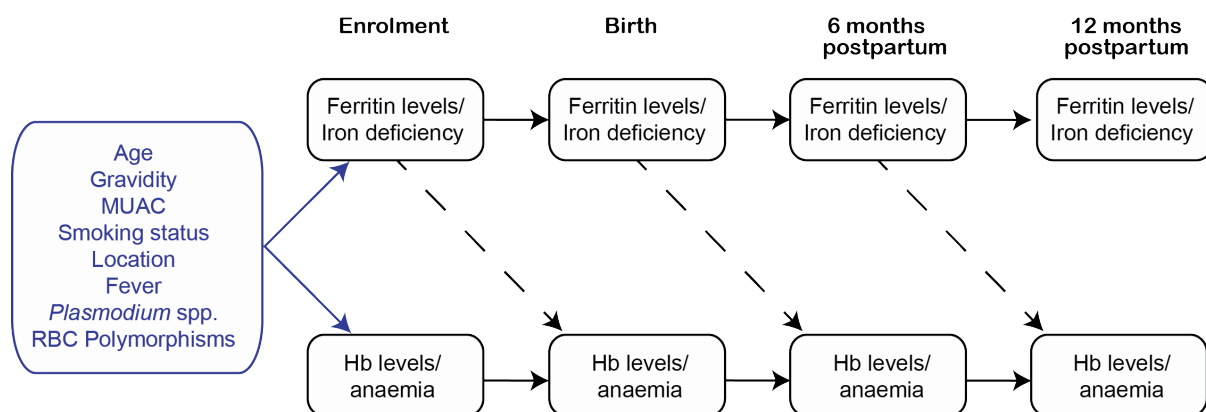

**Supplementary Figure 2: Causal diagram depicts the relationships between ferritin levels/ iron deficiency and haemoglobin (Hb) levels/ anaemia at enrolment, birth, 6 months postpartum and 12 months postpartum. Related to Quantification and Statistical Analysis in STAR Methods.** Potential confounders, presented as a single node in a blue box, include age, gravidity, mid-upper arm circumference (MUAC), location of enrolment clinic, smoking status, history of fever, *Plasmodium* spp. infection and red blood cell (RBC) polymorphisms. Angled dashed arrows depict associations between the preceding iron stores and current haemoglobin levels/anaemia (lagged effect) – the key associations of interest. Adherence to iron supplements was not included as it is not a common cause confounder and was only recorded at a single time-point (birth).

**Supplementary Table 1: Enrolment cohort characteristics for the subset of women who returned at birth, and at 6 and 12 months postpartum. Related to Table 1.**

|                                      |                     | Birth                   | 6 months postpartum     | 12 months postpartum    |                              |
|--------------------------------------|---------------------|-------------------------|-------------------------|-------------------------|------------------------------|
| Variable                             |                     | Included<br>(n=638)     | Included<br>(n=552)     | Included<br>(n=365)     | Lost to follow-up<br>(n=334) |
| <b>Sociodemographics</b>             |                     |                         |                         |                         |                              |
| Enrolment Clinic                     | Vunapope            | 172 (27.0%)             | 155 (28.1%)             | 106 (29.0%)             | 78 (23.4%)                   |
|                                      | Nonga               | 71 (11.1%)              | 63 (11.4%)              | 35 (9.6%)               | 48 (14.4%)                   |
|                                      | Keravat             | 107 (16.8%)             | 92 (16.7%)              | 58 (15.9%)              | 67 (20.1%)                   |
|                                      | Napapar             | 148 (23.2%)             | 123 (22.3%)             | 94 (25.8%)              | 64 (19.2%)                   |
|                                      | Paparatava          | 140 (21.9%)             | 119 (21.6%)             | 72 (19.7%)              | 77 (23.1%)                   |
| Age (years)                          |                     | 26.0 (23.0-30.0); 17-49 | 26.0 (23.0-30.0); 17-49 | 26.0 (22.0-30.0); 17-42 | 26.0 (23.0-30.0); 16-49      |
| Gravidity                            | Primigravidae       | 154 (24.1%)             | 129 (23.4%)             | 98 (26.8%)              | 79 (23.7%)                   |
|                                      | Multigravidae       | 484 (75.9%)             | 423 (76.6%)             | 267 (73.2%)             | 255 (76.3%)                  |
| Highest level education              | Primary or less     | 292 (45.8%)             | 254 (46.1%)             | 167 (45.8%)             | 158 (47.4%)                  |
| Employment status                    | Not employed        | 483 (75.7%)             | 414 (75.0%)             | 271 (74.2%)             | 260 (77.8%)                  |
| Smoking status                       | Never smoked        | 386 (60.6%)             | 340 (61.6%)             | 228 (62.5%)             | 199 (59.9%)                  |
|                                      | Current/past smoker | 251 (39.4%)             | 212 (38.4%)             | 137 (37.5%)             | 133 (40.1%)                  |
| Bed net use                          | Owens bed net       | 479 (75.1%)             | 419 (75.9%)             | 266 (72.9%)             | 261 (78.4%)                  |
|                                      | Net used last night | 398 (62.4%)             | 351 (63.6%)             | 232 (63.6%)             | 208 (78.7%)                  |
| <b>Clinical Measures</b>             |                     |                         |                         |                         |                              |
| Gestational age (weeks) <sup>a</sup> |                     | 29.8 (28.0-32.5); 26-40 | 29.8 (28.0-32.5); 26-40 | 29.8 (28.0-31.6); 26-40 | 29.8 (28.0-33.4); 26-39      |
| MUAC (cm)                            |                     | 26.0 [3.0]; 13.5-43.7   | 26.0 [3.0]; 13.5-43.7   | 26.1 [2.8]; 14.5-37.5   | 25.8 [3.1]; 13.5-43.7        |
| BMI (kg/m <sup>2</sup> )             |                     | 25.3 [3.2]; 17.9-34.3   | 25.3 [3.2]; 17.9-34.3   | 25.2 [3.1]; 18.2-34.3   | 25.4 [3.2]; 17.9-34.3        |
| Fever <sup>b</sup>                   |                     | 81 (12.9%)              | 70 (12.9%)              | 37 (10.2%)              | 54 (16.6%)                   |

Data are mean

[SD], range; median (25th-75thpercentile), range; or n (%).

<sup>a</sup> Gestational age was estimated from ANC fundal height measurements in women with fundal height measurements  $\geq 24$ cm.

<sup>b</sup> Self-reported history of fever during the pregnancy prior to their first ANC appointment.

BMI: Body mass index. MUAC: Mid-upper arm circumference

**Supplementary Table 1 continued: Enrolment cohort characteristics for the subset of women who returned at birth, and at 6 and 12 months postpartum Related to Table 1.**

|                                |                      | Birth                     | 6 months postpartum       | 12 months postpartum      |                           |
|--------------------------------|----------------------|---------------------------|---------------------------|---------------------------|---------------------------|
| Variable                       |                      | Included (n=638)          | Included (n=552)          | Included (n=365)          | Lost to follow-up (n=334) |
| <b>Diagnostic Measurements</b> |                      |                           |                           |                           |                           |
| Haemoglobin level (g/l)        |                      | 96.3 [14.7], 41-145       | 95.9 [14.3], 41-137       | 96.3 [13.9], 41-143       | 96.4 [15.1], 44-145       |
| Anaemia <sup>c</sup>           |                      | 443 (82.2%)               | 383 (82.9%)               | 245 (84.5%)               | 238 (80.1%)               |
| Ferritin level (µg/l)          |                      | 9.1 (5.3-17.7), 0.6-292.4 | 8.9 (5.3-16.9), 0.6-292.4 | 9.2 (5.1-18.2), 0.6-292.4 | 9.3 (5.4-19.2), 0.6-264.5 |
| Iron status <sup>d</sup>       | Iron deficient       | 417 (82.6%)               | 363 (83.1%)               | 236 (81.1%)               | 212 (81.5%)               |
|                                | Iron replete         | 88 (17.4%)                | 74 (16.9%)                | 55 (18.9%)                | 48 (18.5%)                |
| <i>Plasmodium</i> spp. (PCR)   | Negative             | 485 (87.9%)               | 415 (87.7%)               | 266 (87.8%)               | 262 (87.9%)               |
|                                | Positive             | 67 (12.1%)                | 58 (12.3%)                | 37 (12.2%)                | 36 (12.1%)                |
|                                | <i>P. falciparum</i> | 28 (5.1%)                 | 29 (6.1%)                 | 14 (4.6%)                 | 17 (5.7%)                 |
|                                | <i>P. vivax</i>      | 32 (5.8%)                 | 36 (7.4%)                 | 18 (5.9%)                 | 17 (5.7%)                 |
|                                | Mixed                | 7 (1.3%)                  | 7 (1.5%)                  | 5 (1.7%)                  | 2 (0.7%)                  |
| <b>Genetic polymorphisms</b>   |                      |                           |                           |                           |                           |
| α <sup>+</sup> -thalassemia    | Wildtype             | 512 (83.0%)               | 446 (84.0%)               | 292 (83.2%)               | 272 (84.5%)               |
|                                | Heterozygous         | 84 (13.6%)                | 67 (12.6%)                | 49 (14.0%)                | 38 (11.8%)                |
|                                | Homozygous           | 21 (3.4%)                 | 18 (3.4%)                 | 10 (2.8%)                 | 12 (3.7%)                 |
| CR1 deficiency <sup>e</sup>    | H/H                  | 40 (6.4%)                 | 34 (6.3%)                 | 21 (5.8%)                 | 22 (6.9%)                 |
|                                | H/L                  | 232 (37.1%)               | 208 (38.4%)               | 133 (37.0%)               | 119 (37.1%)               |
|                                | L/L                  | 354 (56.5%)               | 299 (55.3%)               | 205 (57.1%)               | 180 (56.1%)               |
| SAO                            | Normal               | 593 (94.6%)               | 513 (94.8%)               | 335 (93.1%)               | 310 (96.6%)               |
|                                | SAO                  | 34 (5.4%)                 | 28 (5.2%)                 | 25 (6.9%)                 | 11 (3.4%)                 |

Data are mean [SD], range; median (25th-75thpercentile), range; or n (%)

<sup>c</sup> Anaemia defined as haemoglobin <110g/l at birth and haemoglobin <120g/l at 6 and 12 months postpartum

<sup>d</sup> Women classified as iron deficient: ferritin <15µg/l in pregnancy and postpartum. Women classified as iron replete: ferritin ≥15µg/l and CRP≤10mg/l in pregnancy and ferritin ≥15µg/l and CRP≤5mg/l postpartum.

<sup>e</sup> Allele abbreviations correspond to CR1 red blood cell surface expression levels: H allele: high expression; L allele: low.

spp: species. RDT: Rapid Diagnostic Test. PCR: Polymerase Chain Reaction. CR1: Complement Receptor 1. SAO: Southeast Asian Ovalocytosis

| <b>Supplementary Table 2: Unadjusted and adjusted estimated mean differences in haemoglobin levels (g/l) over pregnancy and postpartum periods. Related to Figure 2.</b> |                                              |                                                         |
|--------------------------------------------------------------------------------------------------------------------------------------------------------------------------|----------------------------------------------|---------------------------------------------------------|
| <b>Model Parameter</b>                                                                                                                                                   | <b>Unadjusted estimate (95% CI); p-value</b> | <b>Adjusted estimate <sup>a</sup> (95% CI); p-value</b> |
| <b>Estimated mean at enrolment</b>                                                                                                                                       | 96.42 (95.15, 97.69)                         | 98.94 (97.43, 100.45)                                   |
| <b>Estimated mean difference <sup>b</sup></b>                                                                                                                            |                                              |                                                         |
| Enrolment                                                                                                                                                                | Reference                                    | Reference                                               |
| Birth                                                                                                                                                                    | 2.59 (1.04, 4.14); 0.001                     | -0.44 (-2.37, 1.49); 0.65                               |
| 6 months postpartum                                                                                                                                                      | 15.29 (13.73, 16.85); <0.001                 | 11.63 (9.62, 13.65); <0.001                             |
| 12 months postpartum                                                                                                                                                     | 12.17 (10.38, 13.95); <0.001                 | 9.63 (7.38, 11.87); <0.001                              |
| <b>Between-women SD</b>                                                                                                                                                  | 9.32                                         | 7.32                                                    |
| <b>Within-woman SD</b>                                                                                                                                                   | 12.93                                        | 13.02                                                   |

Unadjusted or adjusted estimated mean differences (95% CI), p-value, were derived from linear mixed-effects models with a random effect for the individual-specific intercept. CI- Confidence Interval.

<sup>a</sup> Adjusted for age, mid-upper arm circumference, gravidity, smoking status, location of enrolment clinic, history of fever, *Plasmodium* spp. infection and red blood cell polymorphisms ( $\alpha^+$ -thalassemia, complement receptor 1 deficiency, Southeast Asian ovalocytosis).

<sup>b</sup> The estimated mean haemoglobin level at enrolment is derived with confounders set to mean values of continuous variables or the prevalence of categorical variables.

| <b>Supplementary Table 3: Unadjusted and adjusted relative difference in the geometric mean of ferritin levels (<math>\mu\text{g/l}</math>) over pregnancy and postpartum periods. Related to Figure 2.</b> |                                              |                                                         |
|-------------------------------------------------------------------------------------------------------------------------------------------------------------------------------------------------------------|----------------------------------------------|---------------------------------------------------------|
| <b>Model Parameter</b>                                                                                                                                                                                      | <b>Unadjusted estimate (95% CI); p-value</b> | <b>Adjusted estimate <sup>a</sup> (95% CI); p-value</b> |
| <b>Estimated geometric mean at enrolment (<math>\mu\text{g/l}</math>)</b>                                                                                                                                   | 10.28 (9.62, 10.98)                          | 5.87 (3.26, 10.61)                                      |
| <b>Ratio of geometric means <sup>b</sup></b>                                                                                                                                                                |                                              |                                                         |
| Enrolment                                                                                                                                                                                                   | Reference                                    | Reference                                               |
| Birth                                                                                                                                                                                                       | 2.31 (2.13, 2.49); <0.001                    | 2.30 (2.11, 2.50); <0.001                               |
| 6 months postpartum                                                                                                                                                                                         | 2.81 (2.60, 3.03); <0.001                    | 2.81 (2.58, 3.05); <0.001                               |
| 12 months postpartum                                                                                                                                                                                        | 2.64 (2.41, 2.88); <0.001                    | 2.60 (2.35, 2.87); <0.001                               |
|                                                                                                                                                                                                             |                                              |                                                         |
| <b>Between-women SD (<math>\log_2</math> (<math>\mu\text{g/l}</math>))</b>                                                                                                                                  | 0.57                                         | 0.54                                                    |
| <b>Within-woman SD (<math>\log_2</math> (<math>\mu\text{g/l}</math>))</b>                                                                                                                                   | 0.65                                         | 0.65                                                    |

Unadjusted or adjusted estimated ratio of geometric means (95% CI), p-value, were derived from linear mixed-effects regression models with a random effect for the individual-specific intercept. CI- Confidence Interval.

<sup>a</sup> Adjusted for age, mid-upper arm circumference, gravidity, smoking status, location of enrolment clinic, history of fever, *Plasmodium* spp. infection and red blood cell polymorphisms ( $\alpha^+$ -thalassemia, complement receptor 1 deficiency, Southeast Asian ovalocytosis).

<sup>b</sup> The estimated geometric mean ferritin level at enrolment is derived with confounders set to mean values of continuous variables or the prevalence of categorical variables.

**Supplementary Table 4: Associations between iron stores and enrolment confounders; and the outcome, moderate-to-severe anaemia, over the entire study period. Related to Table 2.**

|                                                 |               | Moderate-to-severe anaemia <sup>a</sup>    |                                          |
|-------------------------------------------------|---------------|--------------------------------------------|------------------------------------------|
| Variable                                        |               | Unadjusted odds ratio<br>(95% CI); p-value | Adjusted odds ratio<br>(95% CI); p-value |
| Iron stores                                     |               |                                            |                                          |
| Ferritin (log <sub>2</sub> (µg/l)) <sup>b</sup> |               | 0.65 (0.59, 0.72); <0.001                  | -                                        |
| Iron deficiency <sup>c</sup>                    |               |                                            |                                          |
|                                                 | Replete       | Reference                                  | Reference                                |
|                                                 | Deficient     | 3.61 (2.56, 5.09); <0.001                  | 3.86 (2.64, 5.65); <0.001                |
| <b>At enrolment</b>                             |               |                                            |                                          |
| Age (years)                                     |               | 1.00 (0.98, 1.03); 0.99                    | 0.99 (0.96, 1.02); 0.55                  |
| Gravidity                                       |               |                                            |                                          |
|                                                 | Primigravida  | Reference                                  | Reference                                |
|                                                 | Multigravida  | 1.66 (1.20, 2.29); 0.002                   | 1.93 (1.23, 3.01); 0.004                 |
| Smoking status                                  |               |                                            |                                          |
|                                                 | Never         | Reference                                  | Reference                                |
|                                                 | Current/ past | 1.18 (0.89, 1.56); 0.26                    | 1.22 (0.87, 1.72); 0.26                  |
| MUAC (cm)                                       |               |                                            |                                          |
|                                                 | >23cm         | Reference                                  | -                                        |
|                                                 | ≤23cm         | 1.46 (0.97, 2.19); 0.07                    | -                                        |
| Fever <sup>d</sup>                              |               |                                            |                                          |
|                                                 | No            | Reference                                  | Reference                                |
|                                                 | Yes           | 1.20 (0.80, 1.82); 0.38                    | 1.31 (0.81, 2.13); 0.27                  |
| <i>Plasmodium</i> spp. (PCR)                    |               |                                            |                                          |
|                                                 | Negative      | Reference                                  | Reference                                |
|                                                 | Positive      | 2.75 (1.73, 4.37); <0.001                  | 2.45 (1.40, 4.29); 0.002                 |
| α <sup>+</sup> - thalassemia                    |               |                                            |                                          |
|                                                 | Wildtype      | Reference                                  | Reference                                |
|                                                 | Het/Hom       | 2.69 (1.83, 3.94); <0.001                  | 3.03 (1.87, 4.91); <0.001                |
| CR1 deficiency                                  |               |                                            |                                          |
|                                                 | H/H           | Reference                                  | Reference                                |
|                                                 | H/L           | 0.88 (0.48, 1.61); 0.68                    | 0.99 (0.50, 1.97); 0.99                  |
|                                                 | L/L           | 0.89 (0.49, 1.59); 0.68                    | 1.00 (0.51, 1.95); 0.99                  |
| SAO                                             |               |                                            |                                          |
|                                                 | Normal        | Reference                                  | Reference                                |
|                                                 | SAO           | 1.35 (0.70, 2.57); 0.37                    | 1.19 (0.59, 2.39); 0.63                  |

Odds ratios were derived from logistic mixed-effects models with a random effect for the individual-specific intercept. Adjusted models included enrolment variables listed in the table and time (enrolment, birth, 6 months and 12 months postpartum). CI- Confidence Interval.

<sup>a</sup> Moderate-to-severe anaemia defined as haemoglobin <100g/l in pregnancy and haemoglobin <110g/l in the postpartum period.

<sup>b</sup> Ferritin transformed to log base-2 due to positively skewed distribution, thus the odds ratio represents the change associated with a two-fold increase in ferritin.

<sup>c</sup> Iron deficient: ferritin <15µg/l in pregnancy and postpartum; iron replete: ferritin ≥15µg/l & CRP≤10mg/l in pregnancy and ferritin ≥15µg/l & CRP≤5mg/l postpartum.

<sup>d</sup> Self-reported history of fever during the pregnancy prior to their first antenatal care appointment.

Het: heterozygous. Hom: homozygous. CR1: complement receptor 1; H/H: high CR1 expression; H/L: intermediate CR1 expression; L/L: low CR1 expression. SAO: Southeast Asian ovalocytosis.



| <b>Supplementary Table 5: Associations between enrolment exposures of interest, ferritin levels and iron deficiency over the entire study period. Related to Table 2.</b> |              |                                                          |                                                        |                                                |                                              |
|---------------------------------------------------------------------------------------------------------------------------------------------------------------------------|--------------|----------------------------------------------------------|--------------------------------------------------------|------------------------------------------------|----------------------------------------------|
|                                                                                                                                                                           |              | <b>Ferritin levels (<math>\mu\text{g/l}</math>)</b>      |                                                        | <b>Iron deficiency *</b>                       |                                              |
|                                                                                                                                                                           |              | <b>Unadjusted geometric mean ratio (95% CI); p-value</b> | <b>Adjusted geometric mean ratio (95% CI); p-value</b> | <b>Unadjusted odds ratio (95% CI); p-value</b> | <b>Adjusted odds ratio (95% CI); p-value</b> |
| Gravidity                                                                                                                                                                 | Primigravida | Reference                                                | Reference                                              | Reference                                      | Reference                                    |
|                                                                                                                                                                           | Multigravida | -0.27 (-0.44, -0.10); 0.002                              | -0.43 (-0.64, -0.22); <0.001                           | 1.74 (1.04, 2.90); 0.04                        | 2.66 (1.41, 5.02); 0.002                     |
| <i>Plasmodium</i> spp. (PCR)                                                                                                                                              | Negative     | Reference                                                | Reference                                              | Reference                                      | Reference                                    |
|                                                                                                                                                                           | Positive     | 0.31 (0.06, 0.55); 0.01                                  | 0.40 (0.13, 0.63); 0.003                               | 0.50 (0.24, 1.04); 0.07                        | 0.47 (0.22, 1.00); 0.05                      |
| $\alpha^+$ -thalassemia                                                                                                                                                   | Wildtype     | Reference                                                | Reference                                              | Reference                                      | Reference                                    |
|                                                                                                                                                                           | Het/Hom      | -0.02 (-0.22, 0.18); 0.84                                | -0.08 (-0.29, 0.14); 0.49                              | 1.30 (0.69, 2.43); 0.42                        | 1.35 (0.71, 2.60); 0.36                      |

Estimated mean ferritin differences and odds ratios were derived from linear and logistic mixed-effects models with a random effect for the individual-specific intercept. Adjusted models included gravidity, *Plasmodium* spp. infection, maternal age, smoking status, mid-upper arm circumference, birth clinic location, fever, genetic polymorphisms ( $\alpha^+$ -thalassemia, complement receptor 1 deficiency and Southeast Asian ovalocytosis), and time (enrolment, birth, 6 months and 12 months postpartum).

\* Iron deficiency in pregnancy defined as ferritin  $<15\mu\text{g/l}$ ; iron replete was defined as ferritin  $\geq 15\mu\text{g/l}$  and CRP  $\leq 10\text{mg/l}$ . Iron deficiency postpartum defined as ferritin  $<15\mu\text{g/l}$ ; iron replete was defined as ferritin  $\geq 15\mu\text{g/l}$  and CRP  $\leq 5\text{mg/l}$ .

Het: heterozygous. Hom: homozygous.

| <b>Supplementary Table 6: Effect modification of the associations between iron measurements and haemoglobin levels (g/l) over the entire study period. Related to Table 2.</b> |                              |                                               |                               |
|--------------------------------------------------------------------------------------------------------------------------------------------------------------------------------|------------------------------|-----------------------------------------------|-------------------------------|
| Potential effect modifier                                                                                                                                                      | Enrolment iron store         | Adjusted estimated mean difference (95% CI) † | Likelihood ratio test p-value |
| <b><i>Plasmodium</i> spp. infection‡</b>                                                                                                                                       |                              |                                               |                               |
| Negative                                                                                                                                                                       | Iron deficient * vs. replete | -7.84 (-9.99, -5.70)                          | 0.57                          |
| Positive                                                                                                                                                                       |                              | -9.39 (-14.54, -3.25)                         |                               |
| <b>Gravidity</b>                                                                                                                                                               |                              |                                               |                               |
| Primigravida                                                                                                                                                                   | Iron deficient * vs. replete | -6.16 (-9.87, -2.46)                          | 0.23                          |
| Multigravida                                                                                                                                                                   |                              | -8.62 (-10.87, -6.36)                         |                               |
| <b><math>\alpha^+</math>-thalassemia genotype</b>                                                                                                                              |                              |                                               |                               |
| Wildtype                                                                                                                                                                       | Iron deficient * vs. replete | -8.37 (-10.57, -6.18)                         | 0.45                          |
| Heterozygous/Homozygous                                                                                                                                                        |                              | -6.55 (-10.97, -2.12)                         |                               |

Estimated mean differences were derived from multivariable linear mixed-effects models with random effects for the individual-specific intercept and interaction terms between the iron store and potential effect modifier. Likelihood ratio test p-values were derived from comparing the likelihood of the models with and without the interaction terms.

† Adjusted for age, mid-upper arm circumference, gravidity, smoking status, residence, history of fever, *Plasmodium* spp. infection and RBC polymorphisms ( $\alpha^+$ -thalassemia, complement receptor 1 deficiency, Southeast Asian ovalocytosis).

‡ *Plasmodium* spp. infection detected by PCR at enrolment.

\* Women classified as iron deficient: ferritin <15 $\mu$ g/l; replete: ferritin  $\geq$ 15 $\mu$ g/l and CRP $\leq$ 10mg/l in pregnancy / CRP $\leq$ 5mg/l postpartum.

| <b>Supplementary Table 7: Effect modification of the associations between iron measurements and anaemia over the entire study period. Related to Table 2.</b> |                              |                          |               |                               |
|---------------------------------------------------------------------------------------------------------------------------------------------------------------|------------------------------|--------------------------|---------------|-------------------------------|
| Potential effect modifier                                                                                                                                     | Enrolment iron store         | Adjusted odds ratio<br>† | (95% CI)      | Likelihood ratio test p-value |
| <b><i>Plasmodium</i> spp. infection</b> ‡                                                                                                                     |                              |                          |               |                               |
| Negative                                                                                                                                                      | Iron deficient * vs. replete | 4.46                     | (2.77, 7.43)  | 0.76                          |
| Positive                                                                                                                                                      |                              | 5.63                     | (1.29, 24.55) |                               |
| <b>Gravidity</b>                                                                                                                                              |                              |                          |               |                               |
| Primigravida                                                                                                                                                  | Iron deficient * vs. replete | 2.67                     | (1.14, 6.24)  | 0.14                          |
| Multigravida                                                                                                                                                  |                              | 5.30                     | (3.08, 9.12)  |                               |
| <b><math>\alpha^+</math>-thalassemia genotype</b>                                                                                                             |                              |                          |               |                               |
| Wildtype                                                                                                                                                      | Iron deficient * vs. replete | 5.17                     | (3.03, 8.81)  | 0.15                          |
| Heterozygous/Homozygous                                                                                                                                       |                              | 2.06                     | (0.63, 6.74)  |                               |

Odds ratios were derived from logistic mixed-effects models with random effects for the individual-specific intercept and interaction terms between the iron store and potential effect modifier. Likelihood ratio test p-values were derived from comparing the likelihood of the models with and without the interaction parameters.

Anaemia defined as haemoglobin <110g/l in pregnancy and <120g/l postpartum.

† Adjusted for age, mid-upper arm circumference, gravidity, smoking status, residence, history of fever, *Plasmodium* spp. infection and RBC polymorphisms ( $\alpha^+$ -thalassemia, complement receptor 1 deficiency, Southeast Asian ovalocytosis).

‡ *Plasmodium* spp. infection detected by PCR at enrolment.

\* Women classified as iron deficient: ferritin <15 $\mu$ g/l; replete: ferritin  $\geq$ 15 $\mu$ g/l and CRP $\leq$ 10mg/l in pregnancy / CRP $\leq$ 5mg/l postpartum.

**Supplementary Table 8: Time-varying contributions of iron deficiency to moderate-to-severe anaemia at enrolment, birth, 6 months postpartum and 12 months postpartum. Related to Table 3.**

|                                     | <b>Evaluation time</b> | <b>Moderate-to-severe anaemia adjusted OR <sup>a</sup> (95% CI); p-value</b> | <b>Population attributable fraction (95% CI)</b> |
|-------------------------------------|------------------------|------------------------------------------------------------------------------|--------------------------------------------------|
| <b>Iron deficiency <sup>b</sup></b> | Enrolment              | 3·04 (1·74, 5·33); <0·001                                                    | 62% (37, 78)                                     |
|                                     | Birth                  | 6·81 (2·23, 20·81); 0·001                                                    | 84% (50, 95)                                     |
|                                     | 6 months postpartum    | 4·06 (2·34, 7·03); <0·001                                                    | 44% (22, 65)                                     |
|                                     | 12 months postpartum   | 2·36 (1·22, 4·57); 0·01                                                      | 30% (5, 57)                                      |

CI- Confidence Interval.

<sup>a</sup> Adjusted odds ratios for moderate-to-severe anaemia, were derived from multivariable logistic mixed-effects models with a random effect for the individual-specific intercept. Models included an interaction term included between exposure and time (enrolment, birth, 6 months postpartum and 12 months postpartum) and included age, mid-upper arm circumference, gravidity, smoking status, residence, fever and genetic polymorphisms.

Moderate-to-severe anaemia defined as haemoglobin <100g/l in pregnancy and haemoglobin <110g/l postpartum.

<sup>b</sup> Women classified as iron deficient: ferritin <15µg/l; replete: ferritin ≥15µg/l & CRP≤10mg/l in pregnancy and ferritin ≥15µg/l & CRP≤5mg/l postpartum.

**Supplementary Table 9: Associations between lagged iron status and maternal haemoglobin levels (g/l) over the entire study period. Related to Table 2.**

|                                                             | <b>Unadjusted estimated mean Hb difference (95% CI); p-value</b> | <b>Adjusted estimated mean Hb difference (95% CI); p-value <sup>a</sup></b> |
|-------------------------------------------------------------|------------------------------------------------------------------|-----------------------------------------------------------------------------|
| <b>Lagged ferritin (log<sub>2</sub>(μg/l)) <sup>b</sup></b> | 1.33(0.57, 2.09); 0.001                                          | 0.31 (-0.64, 1.27); 0.52                                                    |
| <b>Lagged Iron deficient vs. replete <sup>c</sup></b>       | -2.91 (-5.98, 0.15); 0.06                                        | 1.79 (-2.82, 6.37); 0.45                                                    |

Unadjusted and adjusted estimated mean differences were derived from linear mixed-effect models with a random effect for the individual-specific intercept.

<sup>a</sup> Included one of the iron deficiency and lagged counterparts; along with initial haemoglobin measure, time, age, mid-upper arm circumference (MUAC), gravidity, smoking status, residence, fever, *Plasmodium* spp. infection and red blood cell polymorphisms.

<sup>b</sup> Ferritin transformed to log base-2 due to positively skewed distribution, thus the coefficient represents the change associated with a two-fold increase in ferritin.

<sup>c</sup> Women classified as iron deficient: ferritin <15μg/l in pregnancy and postpartum. Women classified as iron replete: ferritin ≥15μg/l and CRP≤10mg/l in pregnancy and ferritin ≥15μg/l and CRP≤5mg/l postpartum.

| <b>Supplementary Table 10: Associations between lagged iron status and maternal anaemia over the entire study period. Related to Table 2.</b> |                                                        |                                                                   |
|-----------------------------------------------------------------------------------------------------------------------------------------------|--------------------------------------------------------|-------------------------------------------------------------------|
|                                                                                                                                               | <b>Unadjusted anaemia odds ratio (95% CI); p-value</b> | <b>Adjusted anaemia odds ratio (95% CI); p-value <sup>a</sup></b> |
| <b>Lagged ferritin (log<sub>2</sub>(μg/l)) <sup>b</sup></b>                                                                                   | 0·90 (0·78, 1·03); 0·12                                | 1·09 (0·94, 1·27); 0·26                                           |
| <b>Lagged Iron deficient vs. replete <sup>c</sup></b>                                                                                         | 1·12 (0·68, 1·85); 0·65                                | 0·62 (0·28, 1·40); 0·25                                           |

Unadjusted and adjusted odds ratios were derived from logistic mixed-effect models with a random effect for the individual-specific intercept.

<sup>a</sup> Included one of the iron deficiency and lagged counterparts; along with initial anaemia status, time, age, mid-upper arm circumference (MUAC), gravidity, smoking status, residence, fever, *Plasmodium* spp. infection and red blood cell polymorphisms.

Anaemia defined as haemoglobin <110g/l in pregnancy and haemoglobin <120g/l in the postpartum period.

<sup>b</sup> Ferritin transformed to log base-2 due to positively skewed distribution, thus the odds ratio represents the change associated with a two-fold increase in ferritin.

<sup>c</sup> Women classified as iron deficient: ferritin <15μg/l in pregnancy and postpartum. Women classified as iron replete: ferritin ≥15μg/l and CRP≤10mg/l in pregnancy and ferritin ≥15μg/l and CRP≤5mg/l postpartum.

**Supplementary Table 11: *P. falciparum* and *P. vivax* qPCR reagent and cycling conditions. Related to Method details in STAR Methods.**

| <b>μL/reaction</b> |      | <b>Cycling parameters</b> |             |
|--------------------|------|---------------------------|-------------|
| Taqman master mix  | 5    | 50°C 2 minutes            |             |
| Forward primer     | 0.4  | 95°C 10 minutes           |             |
| Reverse primer     | 0.4  | 95°C 15 second            | } 45 cycles |
| Probe              | 0.15 | 58°C 60 seconds           |             |
| DNase free water   | 1.05 | 40°C 60 seconds           |             |
| DNA                | 3    |                           |             |

*P. falciparum*: *Plasmodium falciparum*. *P. vivax*: *Plasmodium vivax*. qPCR: quantitative polymerase chain reaction. DNase: deoxyribonuclease. DNA: deoxyribonucleic acid.

**Supplementary Table 12: Red blood cell polymorphism PCR reagent, cycling and gel conditions. Related to Method Details in STAR Methods.**

| Polymorphism                              | Reagent $\mu\text{L}/\text{reaction}$ | Cycling parameters | Gel conditions                                                                                                                           |                                        |
|-------------------------------------------|---------------------------------------|--------------------|------------------------------------------------------------------------------------------------------------------------------------------|----------------------------------------|
| <b><math>\alpha^+</math>- thalassemia</b> | Taq polymerase                        | 0.1                | 98°C 3 minutes<br>98°C 10 seconds<br>65°C 30 seconds<br>60°C 50 seconds<br>72°C 90 seconds<br>72°C 5 minutes<br>} 38 cycles <sup>a</sup> | 1.5% agarose gel<br>100V for 1.5 hours |
|                                           | $\alpha 2/3.7$ Forward primer         | 0.4                |                                                                                                                                          |                                        |
|                                           | $\alpha 2$ Reverse primer             | 0.1                |                                                                                                                                          |                                        |
|                                           | 3.7 Reverse primer                    | 0.6                |                                                                                                                                          |                                        |
|                                           | 4.2 Forward primer                    | 0.4                |                                                                                                                                          |                                        |
|                                           | 4.2 Reverse primer                    | 0.4                |                                                                                                                                          |                                        |
|                                           | PCR buffer                            | 2                  |                                                                                                                                          |                                        |
|                                           | dNTPs                                 | 0.25               |                                                                                                                                          |                                        |
|                                           | Betaine                               | 2                  |                                                                                                                                          |                                        |
|                                           | DMSO                                  | 0.5                |                                                                                                                                          |                                        |
|                                           | DNase free water                      | 2.25               |                                                                                                                                          |                                        |
|                                           | DNA                                   | 1                  |                                                                                                                                          |                                        |
| <b>CR1 deficiency (exon 22)</b>           | Taq polymerase                        | 0.2                | 94°C 60 seconds<br>94°C 15 seconds<br>63°C 15 seconds<br>72°C 90 seconds<br>72°C 10 minutes<br>} 35 cycles                               | 2% agarose gel<br>80V for 1.5 hours    |
|                                           | Forward primer                        | 0.2                |                                                                                                                                          |                                        |
|                                           | Reverse primer                        | 0.2                |                                                                                                                                          |                                        |
|                                           | PCR buffer                            | 1                  |                                                                                                                                          |                                        |
|                                           | dNTPs                                 | 0.2                |                                                                                                                                          |                                        |
|                                           | MgCl <sub>2</sub>                     | 0.5                |                                                                                                                                          |                                        |
|                                           | DNase free water                      | 6.7                |                                                                                                                                          |                                        |
|                                           | DNA                                   | 1                  |                                                                                                                                          |                                        |
| <b>CR1 deficiency (intron 27)</b>         | Taq polymerase                        | 0.2                | 94°C 60 seconds<br>94°C 15 seconds<br>54°C 15 seconds<br>72°C 90 seconds<br>72°C 10 minutes<br>} 35 cycles                               | 2% agarose gel<br>80V for 1.5 hours    |
|                                           | Forward primer                        | 0.2                |                                                                                                                                          |                                        |
|                                           | Reverse primer                        | 0.2                |                                                                                                                                          |                                        |
|                                           | PCR buffer                            | 1                  |                                                                                                                                          |                                        |
|                                           | dNTPs                                 | 0.2                |                                                                                                                                          |                                        |
|                                           | MgCl <sub>2</sub>                     | 0.5                |                                                                                                                                          |                                        |
|                                           | DNase free water                      | 6.7                |                                                                                                                                          |                                        |
|                                           | DNA                                   | 1                  |                                                                                                                                          |                                        |
| <b>SAO</b>                                | Taq polymerase                        | 0.2                |                                                                                                                                          |                                        |



|                   |     |                 |             |                                     |
|-------------------|-----|-----------------|-------------|-------------------------------------|
| Forward primer    | 0.2 | 95°C 2 minutes  | } 35 cycles | 1% agarose gel<br>80V for 1.5 hours |
| Reverse primer    | 0.2 | 95°C 15 seconds |             |                                     |
| PCR buffer        | 1   | 70°C 15 seconds |             |                                     |
| dNTPs             | 0.2 | 72°C 90 seconds |             |                                     |
| MgCl <sub>2</sub> | 0.5 | 72°C 10 minutes |             |                                     |
| DNase free water  | 6.7 |                 |             |                                     |
| DNA               | 1   |                 |             |                                     |

<sup>a</sup> Touchdown cycling used: temperature decreased by 0.5°C/cycle for the first 8 cycles.

PCR: polymerase chain reaction. dNTP: deoxynucleoside triphosphates. DMSO: dimethyl sulfoxide. DNase: deoxyribonuclease. DNA: deoxyribonucleic acid.
